# Supplementary material for: Decoding the domain dynamics of polycrystalline 0.7BiFeO3–0.3BaTiO3
Source: Royal Society of Chemistry journal article supplement (doi:10.1039/d4tc01199f), 2024-01-01
Supplement: d4tc01199f1.pdf [file d4tc01199f1.pdf]

### Decoding the domain dynamics of polycrystalline $0.7\text{BiFeO}_3\text{-}0.3\text{BaTiO}_3$

Lixu Xie<sup>1,2</sup>, Neamul H. Khansur<sup>1</sup>, Mingyue Mo<sup>2</sup>, Ahmed Gadelmawla<sup>1</sup>, Jie Xing<sup>2</sup>, Zhi Tan<sup>2</sup>, Jianguo Zhu<sup>2\*</sup>, and Kyle G. Webber<sup>1</sup>

<sup>1</sup>Department of Materials Science and Engineering, Friedrich-Alexander-Universität Erlangen-Nürnberg (FAU), 91058 Erlangen, Germany

<sup>2</sup>College of Materials Science and Engineering, Sichuan University, 610064 Chengdu, China

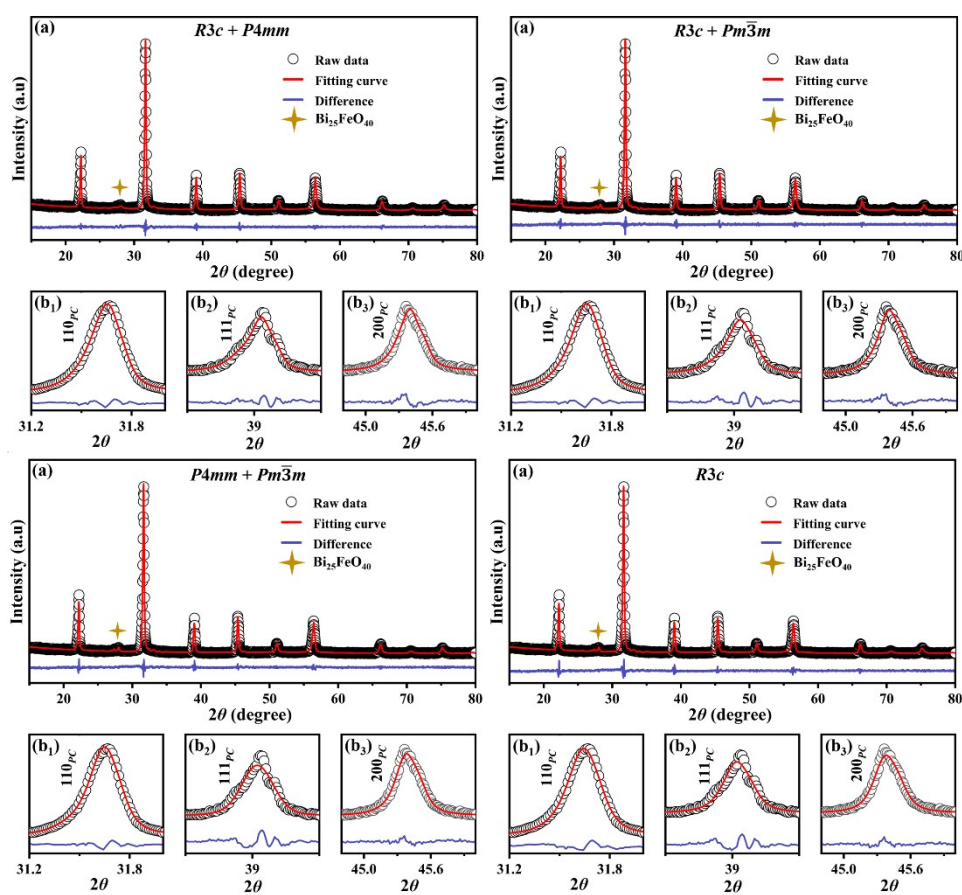

Figure S1. Rietveld refinement XRD patterns of BF30BT with different models.

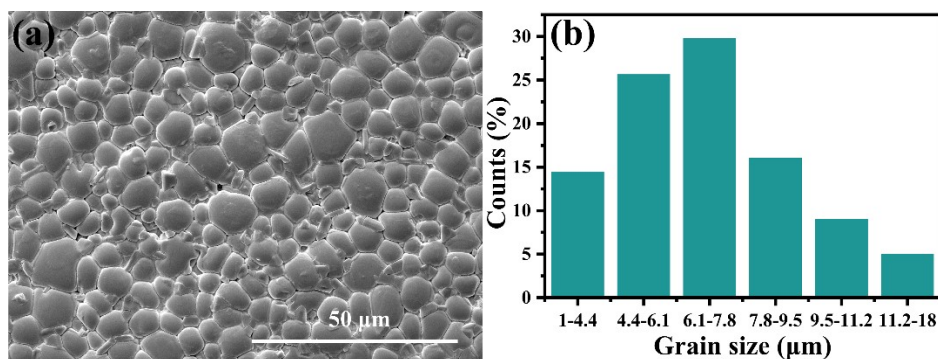

Figure S2. (a) Surface SEM microstructure images of BF30BT and (b) statistics of grain size.

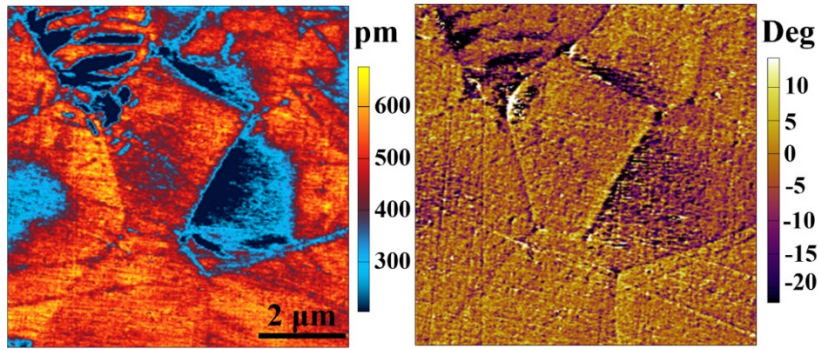

Figure S3. The amplitude and corresponding phase pattern of poled BF30BT ceramic.

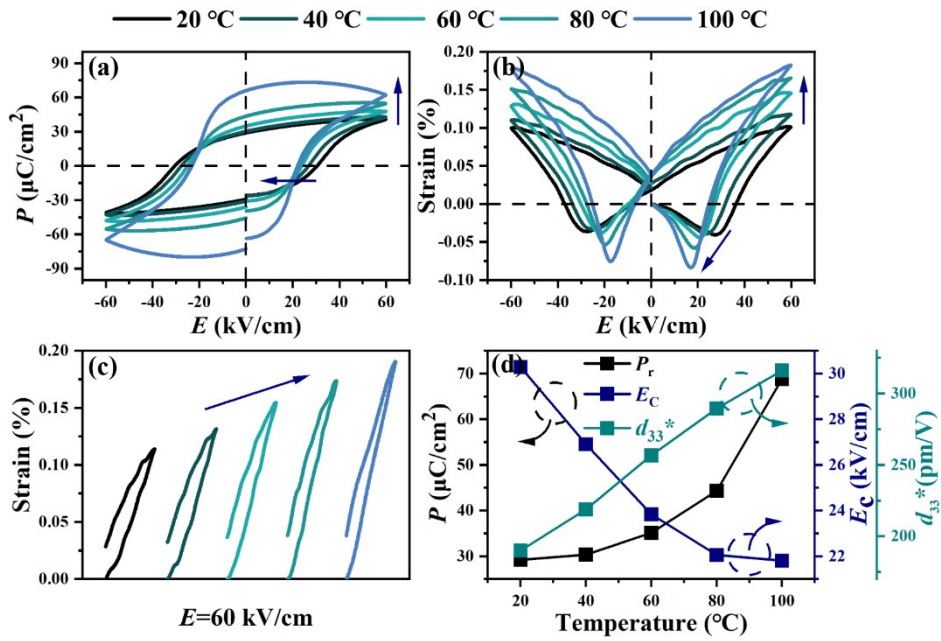

Figure S4. (a) variation of  $P$ - $E$  hysteresis loops as a function of temperature in BF30BT (b) bipolar curves of the BF30BT ceramic as a function of temperature; (c) unipolar curves of the BF30BT ceramic as a function of temperature; (d) variation of  $P_r$ ,  $E_c$ , and  $d_{33}^*$  as a function of temperature.

The frequency dependence of the piezoelectric response  $d_{33}$  at 25 °C is plotted in Figure S4, and its linear relationship is revealed through frequency-dependence Rayleigh analysis.

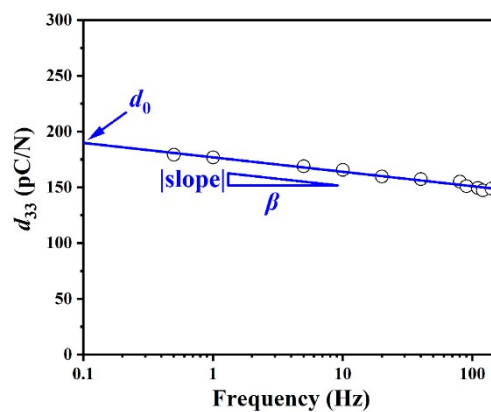

Figure S5. Linear relationship between  $d_{33}$  and frequency at 20 °C.

The amplitude dependence of the piezoelectric response  $d_{33}$  at 250 °C is plotted in Figure S5, and its linear relationship is revealed through amplitude-dependence Rayleigh analysis.

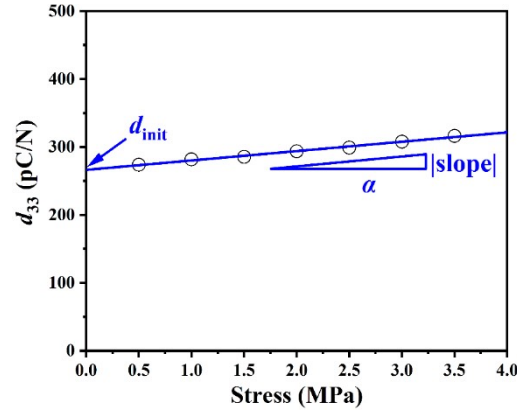

Figure S6. Linear relationship between  $d_{33}$  and stress  $\sigma_A$  at 250 °C.

**Table S1.** Crystal structure parameters of the BF30BT ceramic derived from the Rietveld structure refinement program with different models

| Model              | Sig  | $R_{wp}$ (%) | Symmetry          | Space group  | Phase ratio | $a$ (Å) | $c$ (Å) | $\alpha$ (°) |
|--------------------|------|--------------|-------------------|--------------|-------------|---------|---------|--------------|
| $R3c + P4mm$       | 1.31 | 4.10         | R phase           | $R3c$        | 63.27%      | 5.6439  | 13.8192 |              |
|                    |      |              | T phase           | $P4mm$       | 31.70%      | 3.9962  | 4.0189  |              |
|                    |      |              | $Bi_{25}FeO_{40}$ | $I23$        | 5.03%       |         |         |              |
| $R3c + Pm\bar{3}m$ | 1.38 | 4.31         | R phase           | $R3c$        | 62.01%      | 5.6461  | 13.8229 |              |
|                    |      |              | PC phase          | $Pm\bar{3}m$ | 34.50%      | 4.0010  |         |              |
|                    |      |              | $Bi_{25}FeO_{40}$ | $I23$        | 3.49%       |         |         |              |
| $R3c$              | 1.54 | 4.8          | R phase           | $R3c$        | 95.67%      | 5.6480  | 13.8301 |              |
|                    |      |              | $Bi_{25}FeO_{40}$ | $I23$        | 4.33%       |         |         |              |
|                    |      |              | T phase           | $P4mm$       | 29.48%      | 3.9928  | 4.0497  |              |

|  |  |  |                                 |              |       |        |  |  |
|--|--|--|---------------------------------|--------------|-------|--------|--|--|
|  |  |  | PC phase                        | $Pm\bar{3}m$ | 4.97% | 3.9927 |  |  |
|  |  |  | $\text{Bi}_{25}\text{FeO}_{40}$ | $I23$        | 3.17% |        |  |  |

**Table S2.** Crystal structure parameters of the unpoled BF30BT ceramics derived from the Rietveld structure refinement program with different temperature

| Temperature | Sig  | $R_{wp}$ (%) | Symmetry                           | Space group | Phase ratio | $a$ (Å) | $c$ (Å) | $\alpha$ (°) |
|-------------|------|--------------|------------------------------------|-------------|-------------|---------|---------|--------------|
| 25 °C       | 1.32 | 6.41         | R phase                            | $R3c$       | 62.14%      | 5.6282  | 13.7914 |              |
|             |      |              | T phase                            | $P4mm$      | 33.51%      | 3.9842  | 4.0052  |              |
|             |      |              | Bi <sub>25</sub> FeO <sub>40</sub> | $I23$       | 4.35%       |         |         |              |
|             | 1.59 | 7.34         | R phase                            | $R3m$       | 60.17%      | 3.9727  |         | 89.8736      |
|             |      |              | T phase                            | $P4mm$      | 34.71%      | 3.9861  | 4.0067  |              |
|             |      |              | Bi <sub>25</sub> FeO <sub>40</sub> | $I23$       | 5.15%       |         |         |              |
| 50 °C       | 1.35 | 6.72         | R phase                            | $R3c$       | 60.29%      | 5.6314  | 13.8027 |              |
|             |      |              | T phase                            | $P4mm$      | 35.20%      | 3.9867  | 4.0063  |              |
|             |      |              | Bi <sub>25</sub> FeO <sub>40</sub> | $I23$       | 4.51%       |         |         |              |
|             | 1.57 | 7.21         | R phase                            | $R3m$       | 58.29%      | 3.9734  |         | 89.8862      |
|             |      |              | T phase                            | $P4mm$      | 37.10%      | 3.9869  | 4.0072  |              |
|             |      |              | Bi <sub>25</sub> FeO <sub>40</sub> | $I23$       | 4.61%       |         |         |              |
| 75 °C       | 1.37 | 6.79         | R phase                            | $R3c$       | 58.43%      | 5.6340  | 13.8123 |              |
|             |      |              | T phase                            | $P4mm$      | 37.34%      | 3.9899  | 4.0092  |              |
|             |      |              | Bi <sub>25</sub> FeO <sub>40</sub> | $I23$       | 4.23%       |         |         |              |
|             | 1.54 | 7.38         | R phase                            | $R3m$       | 57.42%      | 3.9760  |         | 89.8911      |
|             |      |              | T phase                            | $P4mm$      | 38.45%      | 3.9884  | 4.0084  |              |
|             |      |              | Bi <sub>25</sub> FeO <sub>40</sub> | $I23$       | 4.13%       |         |         |              |
|             |      |              | R phase                            | $R3c$       | 56.11%      | 5.6365  | 13.8211 |              |

|        |      |      |                                    |             |        |        |         |         |
|--------|------|------|------------------------------------|-------------|--------|--------|---------|---------|
|        |      |      | T phase                            | <i>P4mm</i> | 38.92% | 3.9922 | 4.0104  |         |
|        |      |      | Bi <sub>25</sub> FeO <sub>40</sub> | <i>I23</i>  | 4.97%  |        |         |         |
|        | 1.49 | 7.09 | R phase                            | <i>R3m</i>  | 55.72% | 3.9809 |         | 89.9021 |
|        |      |      | T phase                            | <i>P4mm</i> | 39.71% | 3.9909 | 4.0105  |         |
|        |      |      | Bi <sub>25</sub> FeO <sub>40</sub> | <i>I23</i>  | 4.57%  |        |         |         |
| 150 °C | 1.44 | 6.83 | R phase                            | <i>R3c</i>  | 54.37% | 5.6393 | 13.8244 |         |
|        |      |      | T phase                            | <i>P4mm</i> | 40.61% | 3.9948 | 4.0122  |         |
|        |      |      | Bi <sub>25</sub> FeO <sub>40</sub> | <i>I23</i>  | 5.02%  |        |         |         |
|        | 1.46 | 7.17 | R phase                            | <i>R3m</i>  | 53.91% | 3.9839 |         | 89.9163 |
|        |      |      | T phase                            | <i>P4mm</i> | 41.83% | 3.9919 | 4.0113  |         |
|        |      |      | Bi <sub>25</sub> FeO <sub>40</sub> | <i>I23</i>  | 4.26%  |        |         |         |
| 200 °C | 1.46 | 6.92 | R phase                            | <i>R3c</i>  | 52.76% | 5.6411 | 13.8337 |         |
|        |      |      | T phase                            | <i>P4mm</i> | 42.79% | 3.9957 | 4.0135  |         |
|        |      |      | Bi <sub>25</sub> FeO <sub>40</sub> | <i>I23</i>  | 4.45%  |        |         |         |
|        | 1.44 | 6.98 | R phase                            | <i>R3m</i>  | 52.98% | 3.9861 |         | 89.9356 |
|        |      |      | T phase                            | <i>P4mm</i> | 41.82% | 3.9943 | 4.0121  |         |
|        |      |      | Bi <sub>25</sub> FeO <sub>40</sub> | <i>I23</i>  | 5.20%  |        |         |         |
| 300 °C | 1.48 | 7.01 | R phase                            | <i>R3c</i>  | 50.91% | 5.6421 | 13.8410 |         |
|        |      |      | T phase                            | <i>P4mm</i> | 44.23% | 3.9972 | 4.0148  |         |
|        |      |      | Bi <sub>25</sub> FeO <sub>40</sub> | <i>I23</i>  | 4.86%  |        |         |         |
|        | 1.43 | 6.92 | R phase                            | <i>R3m</i>  | 51.85% | 3.9921 |         | 89.9463 |
|        |      |      | T phase                            | <i>P4mm</i> | 43.78% | 3.9969 | 4.0131  |         |

|        |      |      |                                    |                                |        |        |         |         |
|--------|------|------|------------------------------------|--------------------------------|--------|--------|---------|---------|
|        |      |      | Bi <sub>25</sub> FeO <sub>40</sub> | <i>I23</i>                     | 4.37%  |        |         |         |
| 400 °C | 1.49 | 7.11 | R phase                            | <i>R3c</i>                     | 49.98% | 5.6481 | 13.8635 |         |
|        |      |      | T phase                            | <i>P4mm</i>                    | 45.83% | 4.0012 | 4.0153  |         |
|        |      |      | Bi <sub>25</sub> FeO <sub>40</sub> | <i>I23</i>                     | 4.19%  |        |         |         |
|        | 1.41 | 6.83 | R phase                            | <i>R3m</i>                     | 50.26% | 3.9961 |         | 89.9653 |
|        |      |      | T phase                            | <i>P4mm</i>                    | 45.18% | 4.0018 | 4.0157  |         |
|        |      |      | Bi <sub>25</sub> FeO <sub>40</sub> | <i>I23</i>                     | 4.56%  |        |         |         |
| 450 °C | 1.51 | 7.19 | R phase                            | <i>R3c</i>                     | 47.96% | 5.6504 | 13.8667 |         |
|        |      |      | T phase                            | <i>P4mm</i>                    | 43.94% | 4.0047 | 4.0176  |         |
|        |      |      | Bi <sub>25</sub> FeO <sub>40</sub> | <i>I23</i>                     | 4.81%  |        |         |         |
|        | 1.44 | 7.01 | R phase                            | <i>R3m</i>                     | 48.72% | 3.9986 |         | 89.9811 |
|        |      |      | T phase                            | <i>P4mm</i>                    | 46.69% | 4.0048 | 4.0174  |         |
|        |      |      | Bi <sub>25</sub> FeO <sub>40</sub> | <i>I23</i>                     | 4.59%  |        |         |         |
|        | 1.36 | 6.58 | R phase                            | <i>R3m</i>                     | 37.28% | 3.9995 |         | 89.9847 |
|        |      |      | C phase                            | <i>Pm<math>\bar{3}</math>m</i> | 57.60% | 4.0046 |         |         |
|        |      |      | Bi <sub>25</sub> FeO <sub>40</sub> | <i>I23</i>                     | 5.12%  |        |         |         |

**Table S3.** Crystal structure parameters of the poled BF30BT ceramics derived from the Rietveld structure refinement program with different temperature

| Temperature | Sig  | $R_{wp}$ (%) | Symmetry                           | Space group | Phase ratio | $a$ (Å) | $c$ (Å) | $\alpha$ (°) |
|-------------|------|--------------|------------------------------------|-------------|-------------|---------|---------|--------------|
| 25 °C       | 1.21 | 5.87         | R phase                            | $R3c$       | 72.23%      | 5.6299  | 13.7974 |              |
|             |      |              | T phase                            | $P4mm$      | 22.64%      | 3.9861  | 4.0105  |              |
|             |      |              | Bi <sub>25</sub> FeO <sub>40</sub> | $I23$       | 5.13%       |         |         |              |
|             | 1.49 | 7.13         | R phase                            | $R3m$       | 70.38%      | 3.9767  |         | 89.8635      |
|             |      |              | T phase                            | $P4mm$      | 24.77%      | 3.9856  | 4.0149  |              |
|             |      |              | Bi <sub>25</sub> FeO <sub>40</sub> | $I23$       | 4.84%       |         |         |              |
| 50 °C       | 1.26 | 6.01         | R phase                            | $R3c$       | 70.86%      | 5.6305  | 13.8036 |              |
|             |      |              | T phase                            | $P4mm$      | 36.87%      | 3.9868  | 4.0108  |              |
|             |      |              | Bi <sub>25</sub> FeO <sub>40</sub> | $I23$       | 4.41%       |         |         |              |
|             | 1.47 | 6.93         | R phase                            | $R3m$       | 69.94%      | 3.9734  |         | 89.8832      |
|             |      |              | T phase                            | $P4mm$      | 25.87%      | 3.9878  | 4.0168  |              |
|             |      |              | Bi <sub>25</sub> FeO <sub>40</sub> | $I23$       | 4.19%       |         |         |              |
| 75 °C       | 1.27 | 6.13         | R phase                            | $R3c$       | 68.97%      | 5.6314  | 13.8065 |              |
|             |      |              | T phase                            | $P4mm$      | 25.81%      | 3.9874  | 4.0108  |              |
|             |      |              | Bi <sub>25</sub> FeO <sub>40</sub> | $I23$       | 5.22%       |         |         |              |
|             | 1.47 | 6.81         | R phase                            | $R3m$       | 67.81%      | 3.9843  |         | 89.8903      |
|             |      |              | T phase                            | $P4mm$      | 27.04%      | 3.9885  | 4.0172  |              |
|             |      |              | Bi <sub>25</sub> FeO <sub>40</sub> | $I23$       | 5.15%       |         |         |              |
|             |      |              | R phase                            | $R3c$       | 67.01%      | 5.6319  | 13.8077 |              |



|        |      |      |                                    |             |        |        |         |         |
|--------|------|------|------------------------------------|-------------|--------|--------|---------|---------|
|        |      |      | T phase                            | <i>P4mm</i> | 27.73% | 3.9881 | 4.0113  |         |
|        |      |      | Bi <sub>25</sub> FeO <sub>40</sub> | <i>I23</i>  | 5.26%  |        |         |         |
|        | 1.45 | 6.77 | R phase                            | <i>R3m</i>  | 65.72% | 3.9851 |         | 89.9061 |
|        |      |      | T phase                            | <i>P4mm</i> | 28.49% | 3.9889 | 4.0175  |         |
|        |      |      | Bi <sub>25</sub> FeO <sub>40</sub> | <i>I23</i>  | 5.79%  |        |         |         |
| 150 °C | 1.36 | 6.54 | R phase                            | <i>R3c</i>  | 66.07% | 5.6330 | 13.8105 |         |
|        |      |      | T phase                            | <i>P4mm</i> | 30.76% | 3.9896 | 4.0125  |         |
|        |      |      | Bi <sub>25</sub> FeO <sub>40</sub> | <i>I23</i>  | 3.17%  |        |         |         |
|        | 1.42 | 6.68 | R phase                            | <i>R3m</i>  | 63.89% | 3.9856 |         | 89.9124 |
|        |      |      | T phase                            | <i>P4mm</i> | 32.28% | 3.9896 | 4.0181  |         |
|        |      |      | Bi <sub>25</sub> FeO <sub>40</sub> | <i>I23</i>  | 3.83%  |        |         |         |
| 200 °C | 1.37 | 6.59 | R phase                            | <i>R3c</i>  | 63.91% | 5.6341 | 13.8150 |         |
|        |      |      | T phase                            | <i>P4mm</i> | 35.11% | 3.9916 | 4.0133  |         |
|        |      |      | Bi <sub>25</sub> FeO <sub>40</sub> | <i>I23</i>  | 4.98%  |        |         |         |
|        | 1.36 | 6.49 | R phase                            | <i>R3m</i>  | 61.71% | 3.9871 |         | 89.9241 |
|        |      |      | T phase                            | <i>P4mm</i> | 32.88% | 3.9921 | 4.0201  |         |
|        |      |      | Bi <sub>25</sub> FeO <sub>40</sub> | <i>I23</i>  | 5.41%  |        |         |         |
| 300 °C | 1.40 | 6.72 | R phase                            | <i>R3c</i>  | 61.39% | 5.6436 | 13.8389 |         |
|        |      |      | T phase                            | <i>P4mm</i> | 33.74% | 3.9938 | 4.0151  |         |
|        |      |      | Bi <sub>25</sub> FeO <sub>40</sub> | <i>I23</i>  | 4.87%  |        |         |         |
|        | 1.35 | 6.71 | R phase                            | <i>R3m</i>  | 59.99% | 3.9919 |         | 89.9301 |
|        |      |      | T phase                            | <i>P4mm</i> | 35.00% | 3.9934 | 4.0213  |         |

|        |      |      |                                    |                                |        |        |         |         |
|--------|------|------|------------------------------------|--------------------------------|--------|--------|---------|---------|
|        |      |      | Bi <sub>25</sub> FeO <sub>40</sub> | <i>I23</i>                     | 5.01%  |        |         |         |
| 400 °C | 1.43 | 6.81 | R phase                            | <i>R3c</i>                     | 59.01% | 5.6468 | 13.8592 |         |
|        |      |      | T phase                            | <i>P4mm</i>                    | 36.26% | 3.9989 | 4.0179  |         |
|        |      |      | Bi <sub>25</sub> FeO <sub>40</sub> | <i>I23</i>                     | 4.73%  |        |         |         |
|        | 1.35 | 6.67 | R phase                            | <i>R3m</i>                     | 56.81% | 3.9944 |         | 89.9518 |
|        |      |      | T phase                            | <i>P4mm</i>                    | 38.26% | 4.0018 | 4.0223  |         |
|        |      |      | Bi <sub>25</sub> FeO <sub>40</sub> | <i>I23</i>                     | 4.93%  |        |         |         |
| 450 °C | 1.43 | 7.01 | R phase                            | <i>R3c</i>                     | 54.29% | 5.6512 | 13.8629 |         |
|        |      |      | T phase                            | <i>P4mm</i>                    | 40.99% | 4.0042 | 4.0183  |         |
|        |      |      | Bi <sub>25</sub> FeO <sub>40</sub> | <i>I23</i>                     | 4.72%  |        |         |         |
|        | 1.36 | 6.70 | R phase                            | <i>R3m</i>                     | 51.39% | 3.9978 |         | 89.9774 |
|        |      |      | T phase                            | <i>P4mm</i>                    | 42.80% | 4.0053 | 4.0245  |         |
|        |      |      | Bi <sub>25</sub> FeO <sub>40</sub> | <i>I23</i>                     | 5.81%  |        |         |         |
|        | 1.31 | 6.59 | R phase                            | <i>R3m</i>                     | 43.70% | 3.9976 |         | 89.9501 |
|        |      |      | C phase                            | <i>Pm<math>\bar{3}</math>m</i> | 51.18% | 4.0050 |         |         |
|        |      |      | Bi <sub>25</sub> FeO <sub>40</sub> | <i>I23</i>                     | 5.12%  |        |         |         |

**Table S4.** Electrical properties of BF30BT ceramic at room temperature

| $d_{33}$ | $k_p$ | $Q_m$ | $\tan \delta$ | $P_r$ | $E_c$ |
|----------|-------|-------|---------------|-------|-------|
|----------|-------|-------|---------------|-------|-------|

|          |      |    |      |                                |            |
|----------|------|----|------|--------------------------------|------------|
| 165 pC/N | 0.32 | 50 | 0.02 | 29.2 $\mu\text{C}/\text{cm}^2$ | 30.3 kV/cm |
|----------|------|----|------|--------------------------------|------------|
